# Supplementary material for: Loss of SMAD4 Promotes Lung Metastasis of Colorectal Cancer by Accumulation of CCR1+ Tumor-Associated Neutrophils through CCL15-CCR1 Axis
Source: Oxford University Press journal article supplement (doi:10.1158/1078-0432.ccr-16-0520), 2016-08-04
Supplement: 10780432ccr160520-sup-162991_1_supp_3557543_g9cggv.doc [file 10780432ccr160520-sup-162991_1_supp_3557543_g9cggv.doc]

**Supplementary Figure legends**

**Supplementary Figure S1.**

A and B, Western blot analysis of SMAD4 (A) and quantitative RT-PCR analysis of *CCL15* mRNA (B) in luciferase-expressing HT29 cells where *SMAD4* was stably overexpressed (Luc-HT29 cMyc-*SMAD4*). *, *P* < 0.05. C and D, Western blot analysis of SMAD proteins (SMAD4, SMAD5, SMAD2/3 and SMAD1) (C) and quantitative RT-PCR analysis of *CCL15* mRNA (D) in HT29 and HCT116 cells. E, Immunohistochemistry analyses of mouse lung with metastatic foci of HT29 and HCT116 cells. Scale bar, 100μm. F, Cell proliferation *in vitro* of Luc-HT29 cMyc-tag cells treated with DMSO (control) or J-113863 (0.01μM, 0.1μM, 1μM, and 10μM). G, Experimental schedule of treatment with vehicle or J-113863. H, Relative quantification of the lung metastatic lesions (photon counts) in SCID mice treated with vehicle or J-113863 at 10 mg/kg. Each photon count at day 14 and 21 was normalized to that at day 7.

**Supplementary Figure S2.**

A, Kaplan-Meier curves of RFS in CRC patients after curative pulmonary resection (Kaplan-Meier estimates). B, Effect of T factor of primary CRC on RFS after curative pulmonary resection (Kaplan-Meier estimates). C, Effect of N factor of primary CRC on RFS after curative pulmonary resection (Kaplan-Meier estimates). D, Effect of preoperative CEA level on RFS after curative pulmonary resection (Kaplan-Meier estimates).

**Supplementary Figure S3.**

A, Kaplan-Meier curves of OS in CRC patients after pulmonary resection (Kaplan-Meier estimates). B, Effects of CCL15 expression on OS in CRC patients after pulmonary resection with lung metastases (Kaplan-Meier estimates).

**Supplementary Figure S4.**

Simultaneous immunofluorescence staining for CCR1 (red) and CD3 (A), CD8 (B), CD68 (C), -SMA (D), CD14 (E), or CXCR2 (F) (green). Scale bar, 20 m.

**Supplementary Figure S5.**

Simultaneous immunofluorescence staining for CCR1 (red) and CD11b (A), CD33 (B), HLA-DR (C), or CD15 (D) (green). Scale bar, 20 m.

**Supplementary Figure S6.**

Characterization of CCR1+ cells in the tumor microenvironment of CRC liver metastases. Simultaneous immunofluorescence staining for CCR1 (red) and MPO (A), CD11b (B), CD33 (C), HLA-DR (D), CD15 (E), CD16 (F), ARG1 (G) or MMP9 (H) (green). Scale bar, 20 m.
